# Supplementary material
Source: PubMed Central journal article supplement (PMC10234080)

Suppl Fig. 1 Representative histological images in secukinumab and placebo groups

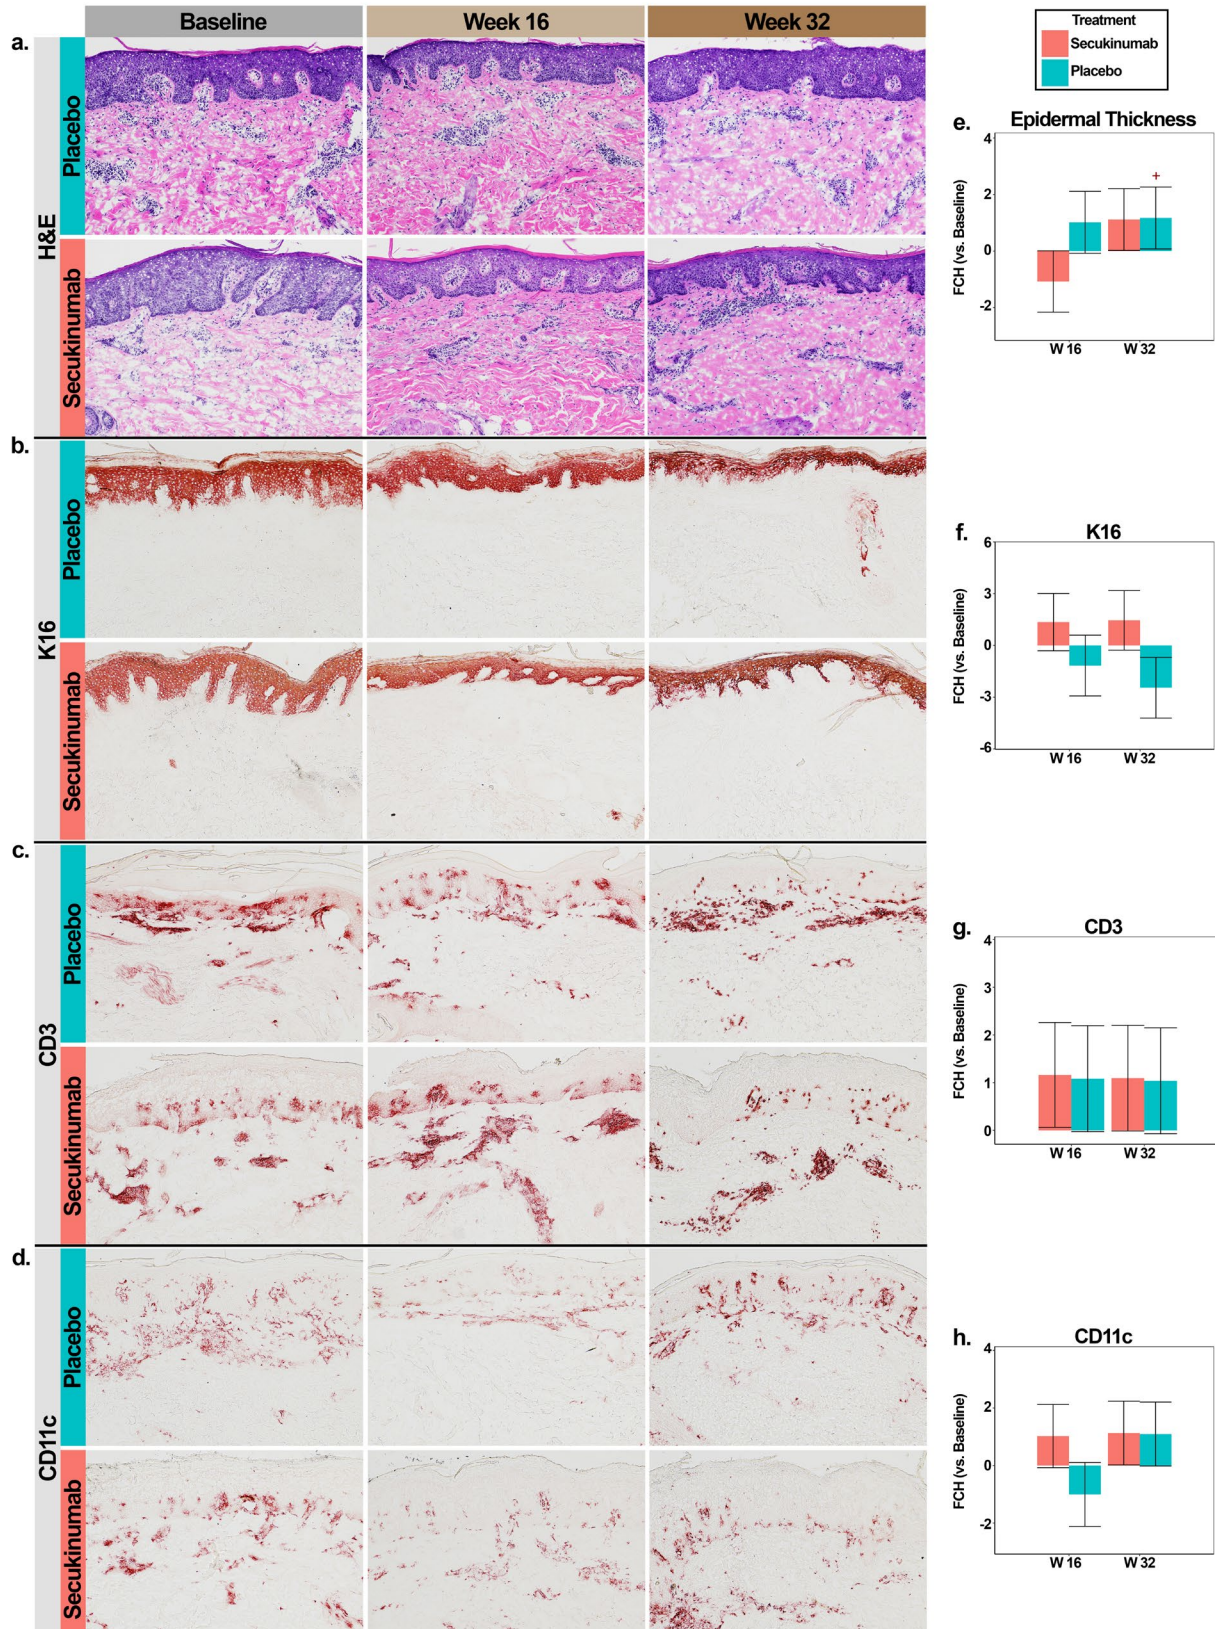

Suppl Fig. 2 Heatmap of qRT-PCR data

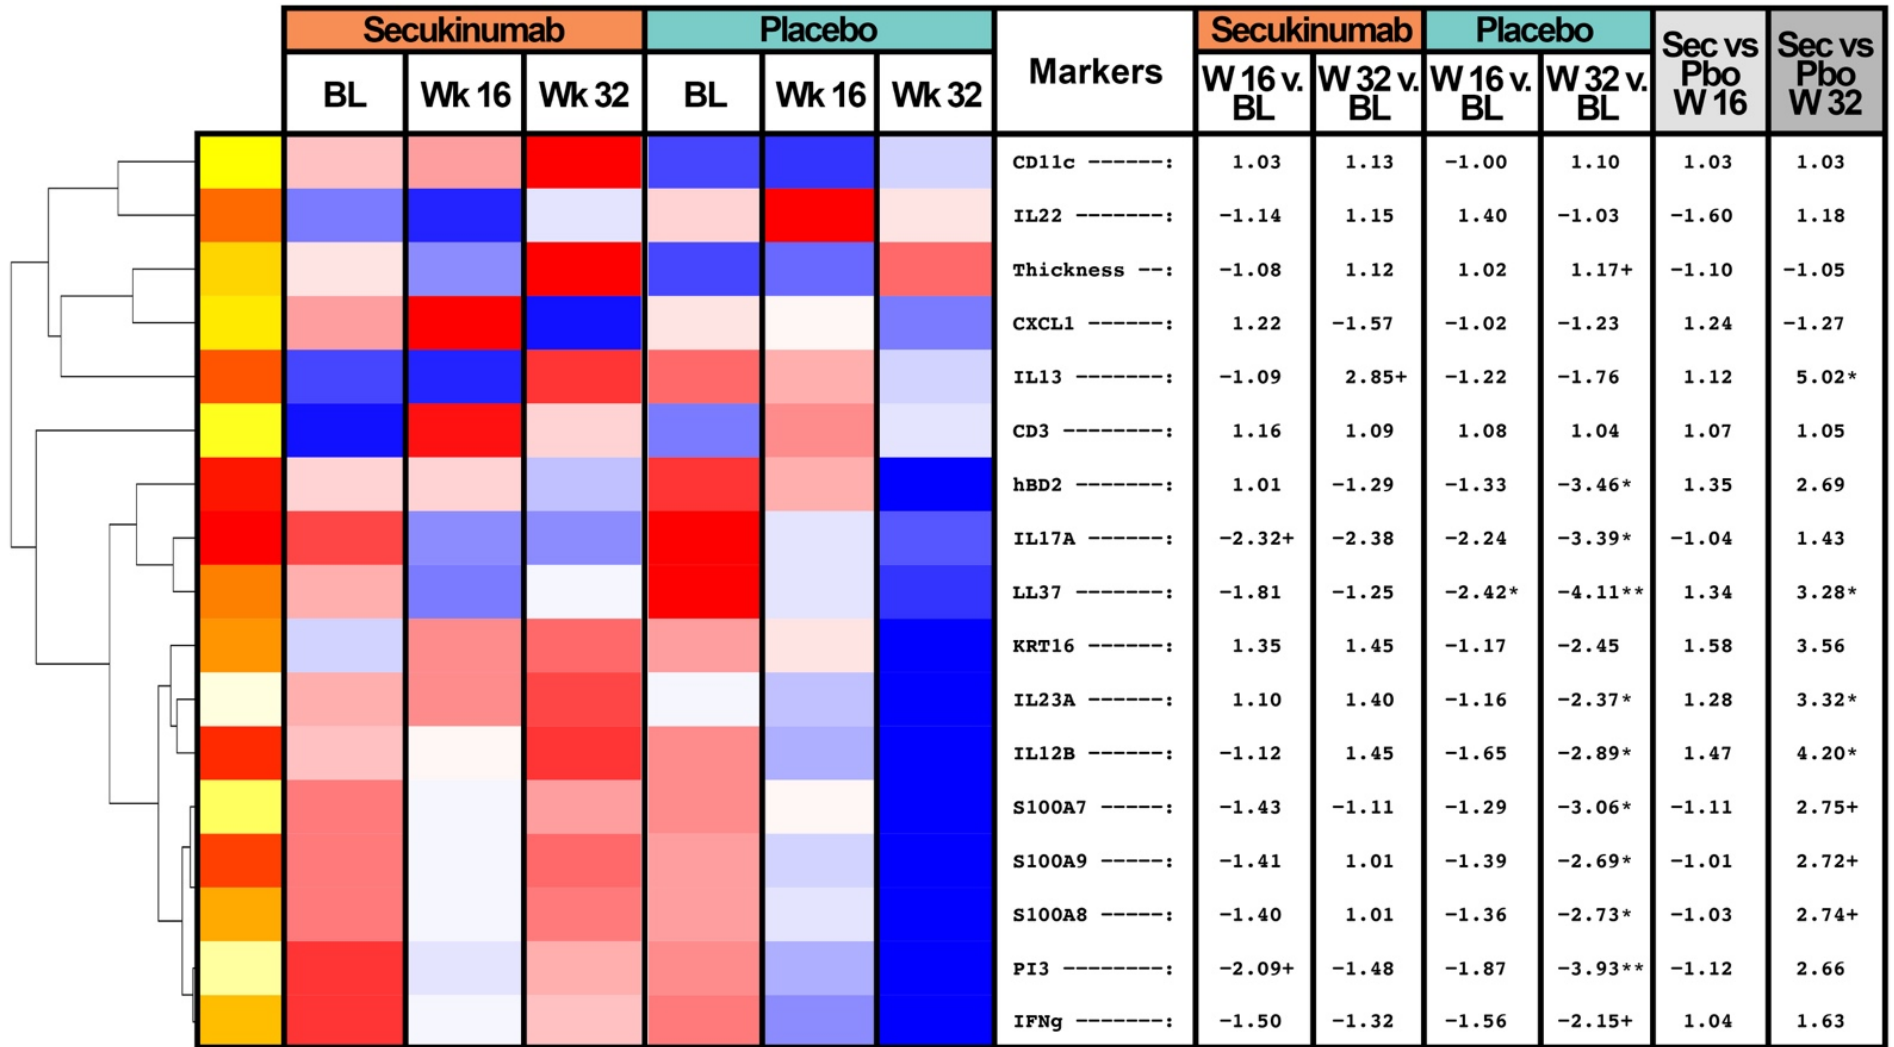

Suppl Fig. 3 Barplots of change in inflammatory biomarkers in skin

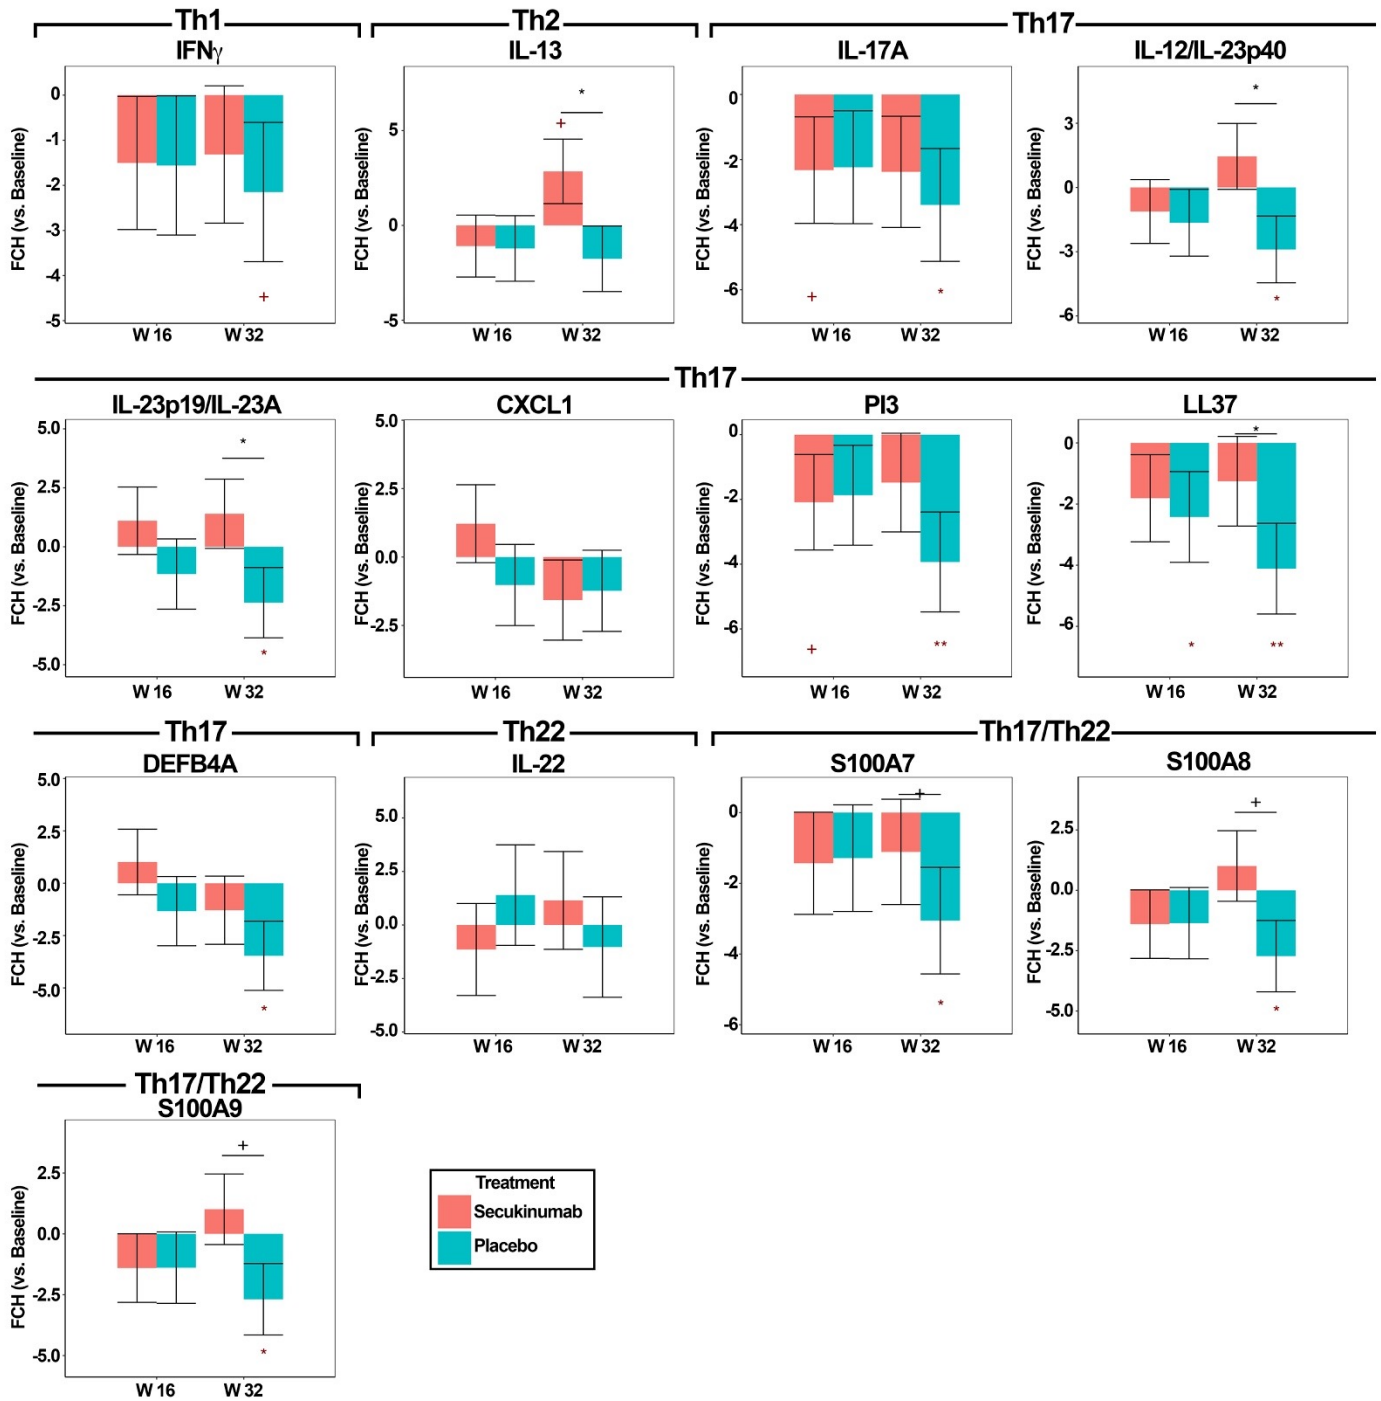

Supplement: NIHMS1898279-supplement-Lefferdink_PMID35218370_ArchDermRes_2023_Suppl2.pdf [file NIHMS1898279-supplement-Lefferdink_PMID35218370_ArchDermRes_2023_Suppl2.pdf]
